# Supplementary material for: Chromatin Remodelling Molecule ARID1A Determines Metastatic Heterogeneity in Triple-Negative Breast Cancer by Competitively Binding to YAP
Source: MDPI journal article supplement (doi:10.3390/cancers15092447), 2023-04-25
Supplement: s1 [file s1]

Figure S1

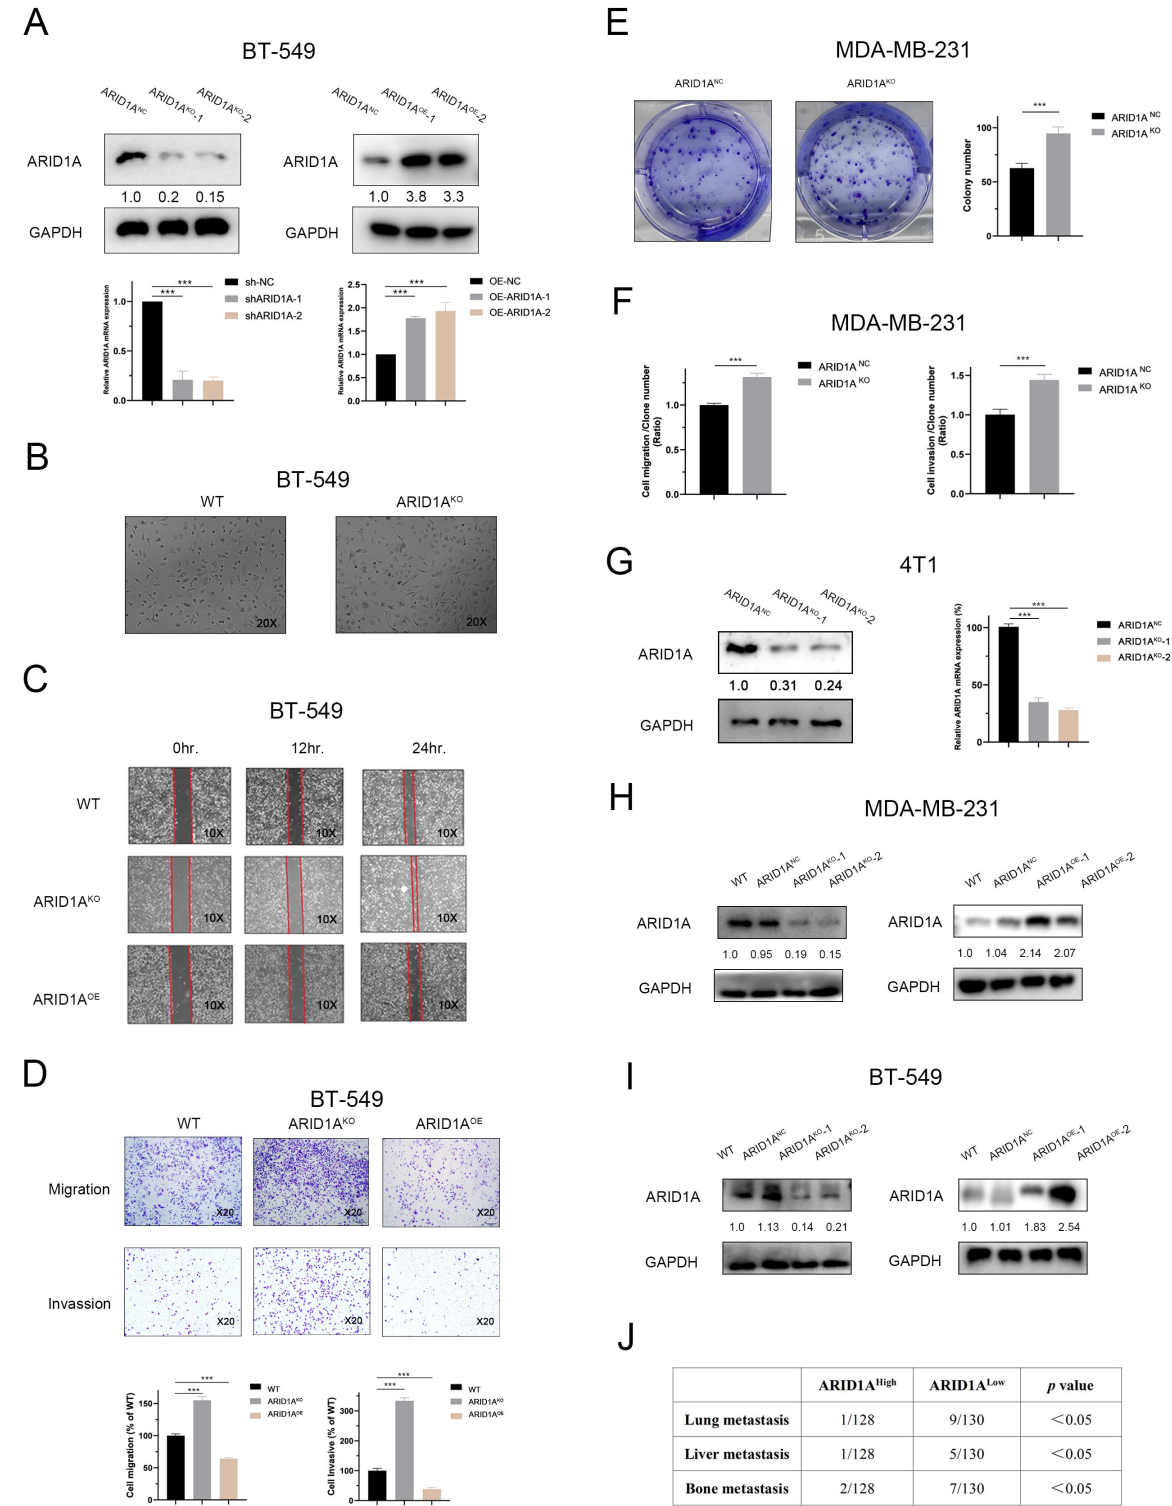

**Figure S1:** Inhibition of ARID1A promotes migration and invasion in TNBC cells. **(A)** BT-549 cells were silenced by CRISPR/Cas9-mediated knockdown and overexpressed by a plasmid. ARID1A expression levels were determined by Western blotting and qRT-PCR. **(B)** Cell morphology was observed under an optical microscope in BT-549 cells of each group. **(C-D)** Migration and invasion of BT-549 cells from each group were detected by wound healing assay **(C)** and transwell

migration and invasion assay **(D)**. **(E)** Cloning formation experiment in ARID1A<sup>NC</sup> and ARID1A<sup>KO</sup> cells. **(F)** Cell invasion and metastasis rate after standardised clonal growth. **(G)** 4T1 cells were silenced by CRISPR/Cas9-mediated knockdown. ARID1A expression levels were determined by Western blotting and qRT-PCR. **(H)** Western blot assay of ARID1A expression in MDA-MB-231 cells in the wild type, ARID1A<sup>NC</sup>, ARID1A<sup>KO</sup>, or ARID1A<sup>OE</sup> groups. **(I)** Western blot assay of ARID1A expression in BT-549 cells in the wild type, ARID1A<sup>NC</sup>, ARID1A<sup>KO</sup>, or ARID1A<sup>OE</sup> groups. **(J)** Statistics and analysis of lung, liver, and bone metastasis in 258 TNBC patients. Error bars represent the standard deviation among replicates. Data are presented as the mean  $\pm$  SEM (n = 3), and statistical significance was determined by \*\*\*  $p < 0.05$ .

**Figure S2**

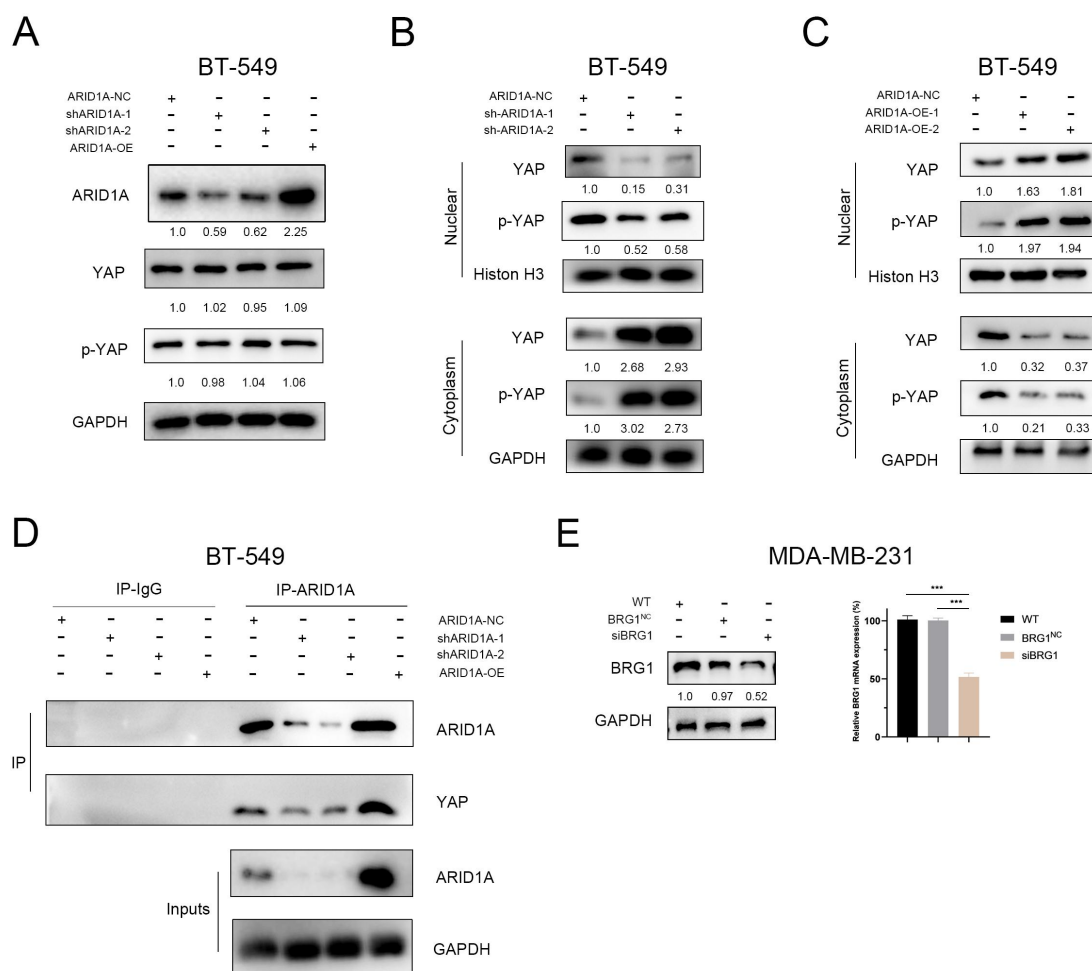

**Figure S2:** ARID1A competitively binds YAP to form an ARID1A/YAP complex. **(A)** Western blot assay of YAP expression in each group of BT-549 cells. **(B)** Western blot assay of cytoplasmic and nuclear YAP and p-YAP expression in MDA-MB-231 cells between ARID1A<sup>NC</sup> and ARID1A<sup>KO</sup> groups. **(C)** Western blot assay of cytoplasmic and nuclear YAP and p-YAP expression in MDA-MB-231 cells between ARID1A<sup>NC</sup> and ARID1A<sup>OE</sup> groups. Western blot assay of cytoplasmic and nuclear YAP expression in each group of BT-549 cells. **(D)** ARID1A and YAP interaction was detected in BT-549 cells using anti-ARID1A and anti-YAP antibodies for Co-IP and Western blot assays. **(E)** MDA-MB-231 cells were knocked down by siBRG1. BRG1 expression levels were determined by Western blotting and qRT-PCR. Error bars represent the standard deviation among replicates. Data are presented as the mean  $\pm$  SEM (n = 3).

**Figure S3**

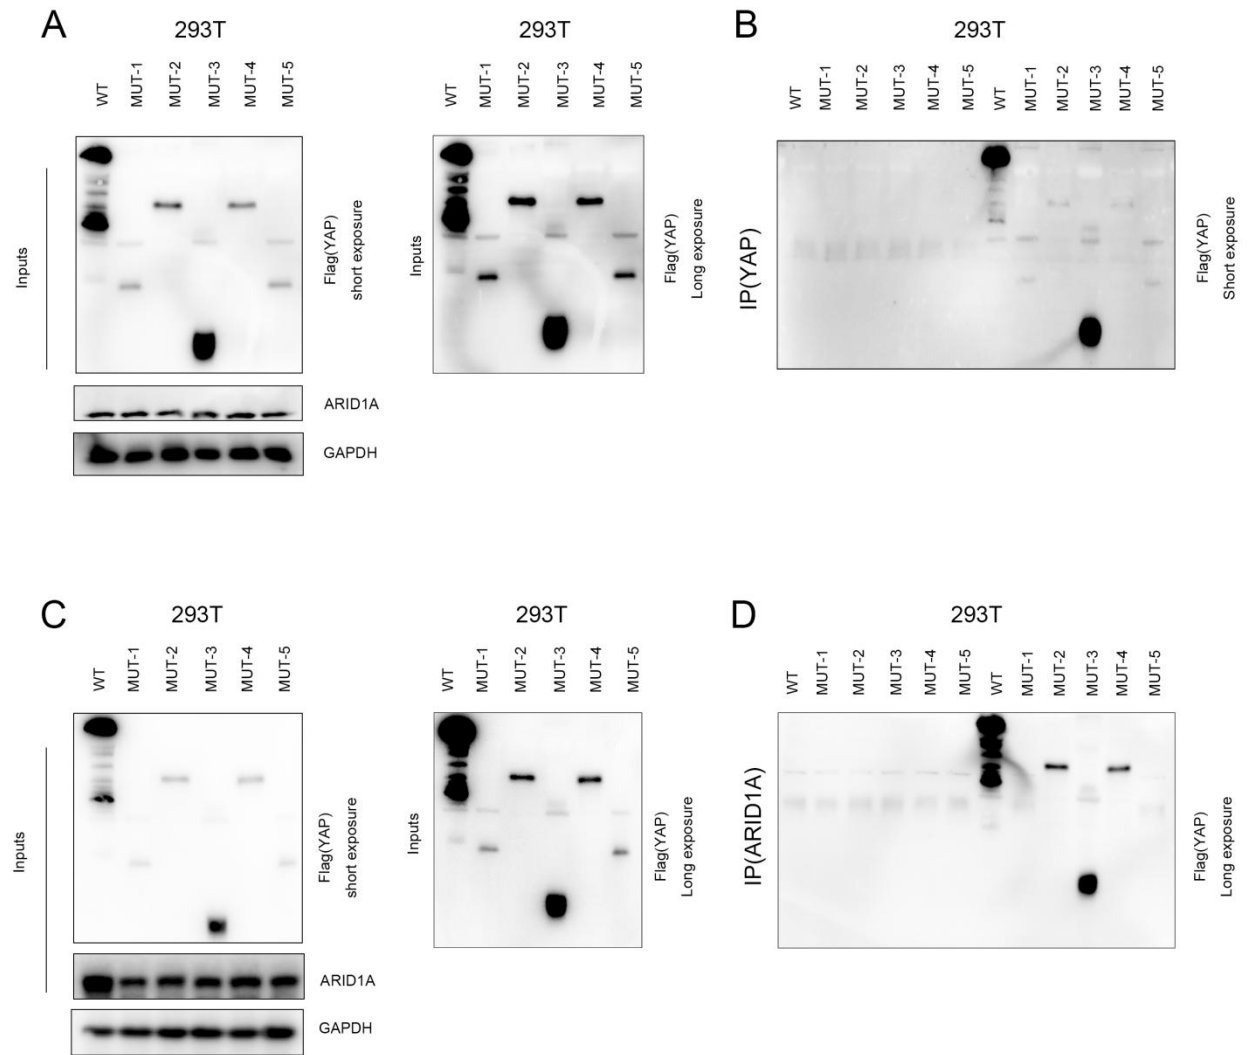

**Figure S3:** ARID1A binds with YAP via the WW domain. **(A-B)** HEK293T cells were transfected with the indicated plasmids. Western blot (Input) and Co-IP (IP-YAP) assays were performed to assess the interaction between ARID1A and truncated mutations of YAP. **(C-D)** HEK293T cells were transfected with the indicated plasmids. Western blot (Input) and Co-IP (IP-ARID1A) assays were performed to assess the interaction between ARID1A and truncated mutations of YAP. Error bars represent the standard deviation among replicates. Data are presented as the mean  $\pm$  SEM (n = 3).
