# Supplementary material for: Chromatin Remodelling Molecule ARID1A Determines Metastatic Heterogeneity in Triple-Negative Breast Cancer by Competitively Binding to YAP
Source: MDPI journal article supplement (doi:10.3390/cancers15092447), 2023-04-25
Supplement: s1 [file s1]

**Table S1. Sequences of the primers and shRNA used for this****study** The primers sequences were as follows:

| Gene       | Forward sequence 5'-3'  | Reverse sequence 5'-3' |
|------------|-------------------------|------------------------|
| ARID1A     | AAGCCACCAACTCCAGCATCCA  | CGCTTCTGGAATGTGGAGTCAC |
| mARIDA     | CTTCCCCAACCACCAGTACAA   | CTGTGCGAAGGACGAAGAC    |
| E-cadherin | GCCTCCTGAAAAGAGAGTGGAAG | TGGCAGTGTCTCTCCAAATCCG |
| N-cadherin | CCTCCAGAGTTTACTGCCATGAC | GTAGGATCTCCGCCACTGATTC |
| Snail      | TGCCCTCAAGATGCACATCCGA  | GGGACAGGAGAAGGGCTTCTC  |
| GAPDH      | GTCTCCTCTGACTTCAACAGCG  | ACCACCCTGTTGCTGTAGCCAA |
| mGAPDH     | AGGTCGGTGTGAACGGATTTG   | GGGGTCGTTGATGGCAACA    |

**The shRNA sequences were as follows:**

| Species | Gene                    | Sequence                        |
|---------|-------------------------|---------------------------------|
| mouse   | ARID1A <sup>KO</sup> -1 | 5'-GGTCCCTGTTGTTGCGAGTA-3'      |
| mouse   | ARID1A <sup>KO</sup> -2 | 5'-gACCCCATGACCATGCAGGGC-3'     |
| mouse   | YAP <sup>KD</sup> -1    | 5'-AGGCCAGTACTGATGCAGGTA-3'     |
| mouse   | YAP <sup>KD</sup> -2    | 5'-CAGGACCTCTTCCTGATGGAT-3'     |
| human   | ARID1A <sup>KO</sup> -1 | 5'-CACCGATGGTCATCGGGTACCGCTG-3' |
| human   | ARID1A <sup>KO</sup> -2 | 5'-CACCGCCCCTCAATGACCTCCAGTA-3' |
| human   | ARID1A <sup>OE</sup> -1 | 5'-CACCGGGCGCTCTAGCCGCTCAGTC-3' |
| human   | ARID1A <sup>OE</sup> -2 | 5'-CACCGCTTGGGTCGAGGCTGCTGCG-3' |
| human   | YAP <sup>KD</sup> -1    | 5'-CCCAGTTAAATGTTACCAAT-3'      |
| human   | YAP <sup>KD</sup> -2    | 5'-CACCAAGCTAGATAAAGAA-3'       |

**Table S2: Characteristics of 258 patients in FUSCC TNBC cohort**

| Number | ARID1A rank | OS/m | RFS/m | 0=survival, 1=die |
|--------|-------------|------|-------|-------------------|
| 1      | hi          | 56.1 | 56.1  | 0                 |
| 2      | low         | 21.0 | 21.0  | 0                 |
| 3      | low         | 48.7 | 48.7  | 0                 |
| 4      | hi          | 54.2 | 30.8  | 0                 |
| 5      | low         | 55.0 | 55.0  | 0                 |
| 6      | hi          | 60.5 | 30.5  | 0                 |
| 7      | hi          | 48.0 | 47.9  | 0                 |
| 8      | hi          | 58.3 | 30.7  | 0                 |
| 9      | low         | 16.6 | 8.8   | 0                 |
| 10     | low         | 53.7 | 53.7  | 0                 |
| 11     | low         | 62.9 | 48.7  | 0                 |
| 12     | hi          | 57.8 | 38.7  | 0                 |
| 13     | low         | 54.4 | 54.4  | 0                 |
| 14     | low         | 45.3 | 23.2  | 0                 |
| 15     | low         | 37.5 | 20.7  | 0                 |
| 16     | hi          | 37.7 | 37.7  | 0                 |
| 17     | hi          | 58.3 | 58.3  | 0                 |
| 18     | low         | 55.7 | 55.7  | 0                 |
| 19     | low         | 37.3 | 37.3  | 0                 |
| 20     | hi          | 55.9 | 55.9  | 0                 |
| 21     | low         | 45.6 | 45.6  | 0                 |
| 22     | hi          | 60.3 | 30.5  | 0                 |
| 23     | low         | 30.5 | 30.5  | 0                 |
| 24     | low         | 44.2 | 44.2  | 0                 |
| 25     | hi          | 55.2 | 55.2  | 0                 |
| 26     | hi          | 57.5 | 57.5  | 0                 |
| 27     | hi          | 56.8 | 56.8  | 0                 |
| 28     | low         | 57.0 | 57.0  | 0                 |
| 29     | hi          | 56.1 | 56.1  | 0                 |
| 30     | hi          | 48.3 | 30.5  | 0                 |
| 31     | low         | 37.3 | 33.4  | 0                 |
| 32     | hi          | 56.3 | 56.3  | 0                 |
| 33     | hi          | 60.9 | 30.8  | 0                 |
| 34     | hi          | 56.9 | 30.5  | 0                 |
| 35     | hi          | 53.7 | 53.7  | 0                 |
| 36     | hi          | 58.5 | 57.8  | 0                 |
| 37     | low         | 49.9 | 49.9  | 0                 |
| 38     | low         | 59.5 | 19.9  | 1                 |

|    |     |      |      |   |
|----|-----|------|------|---|
| 39 | low | 20.7 | 12.9 | 1 |
| 40 | low | 59.0 | 26.1 | 0 |
| 41 | low | 55.3 | 55.3 | 0 |
| 42 | low | 26.0 | 23.5 | 0 |
| 43 | hi  | 42.2 | 20.7 | 1 |
| 44 | low | 56.4 | 56.4 | 0 |
| 45 | low | 43.8 | 27.7 | 0 |
| 46 | low | 49.2 | 30.4 | 0 |
| 47 | low | 52.9 | 30.5 | 0 |
| 48 | hi  | 58.6 | 31.1 | 0 |
| 49 | hi  | 58.1 | 58.1 | 0 |
| 50 | low | 60.2 | 30.4 | 0 |
| 51 | low | 60.4 | 38.3 | 0 |
| 52 | low | 55.4 | 55.4 | 0 |
| 53 | low | 47.0 | 47.0 | 0 |
| 54 | hi  | 57.1 | 57.1 | 0 |
| 55 | hi  | 57.9 | 57.9 | 0 |
| 56 | low | 58.2 | 30.3 | 0 |
| 57 | low | 32.9 | 24.5 | 1 |
| 58 | hi  | 54.6 | 54.6 | 0 |
| 59 | low | 56.5 | 56.5 | 0 |
| 60 | hi  | 61.6 | 30.1 | 0 |
| 61 | hi  | 50.3 | 50.3 | 0 |
| 62 | hi  | 54.6 | 54.6 | 0 |
| 63 | hi  | 57.1 | 53.2 | 0 |
| 64 | hi  | 58.1 | 58.1 | 0 |
| 65 | hi  | 62.0 | 30.2 | 0 |
| 66 | hi  | 57.9 | 57.9 | 0 |
| 67 | hi  | 55.9 | 55.9 | 0 |
| 68 | low | 26.9 | 26.3 | 1 |
| 69 | hi  | 47.5 | 47.5 | 0 |
| 70 | hi  | 53.5 | 28.0 | 0 |
| 71 | hi  | 56.5 | 56.5 | 0 |
| 72 | hi  | 61.5 | 29.9 | 0 |
| 73 | hi  | 57.1 | 57.1 | 0 |
| 74 | hi  | 55.8 | 55.8 | 0 |
| 75 | hi  | 57.4 | 57.4 | 0 |
| 76 | hi  | 57.9 | 57.9 | 0 |
| 77 | hi  | 43.4 | 30.2 | 0 |
| 78 | hi  | 58.3 | 30.2 | 0 |
| 79 | hi  | 56.4 | 56.4 | 0 |

|     |     |      |      |   |
|-----|-----|------|------|---|
| 80  | low | 58.0 | 30.2 | 0 |
| 81  | low | 57.4 | 30.4 | 0 |
| 82  | low | 54.3 | 54.3 | 0 |
| 83  | hi  | 38.3 | 38.3 | 0 |
| 84  | hi  | 53.3 | 53.3 | 0 |
| 85  | low | 14.8 | 6.2  | 0 |
| 86  | low | 57.8 | 57.8 | 0 |
| 87  | hi  | 57.0 | 57.0 | 0 |
| 88  | hi  | 36.7 | 24.4 | 0 |
| 89  | hi  | 53.8 | 53.8 | 0 |
| 90  | low | 48.0 | 30.0 | 0 |
| 91  | hi  | 54.6 | 54.6 | 0 |
| 92  | low | 30.0 | 30.0 | 0 |
| 93  | low | 59.8 | 29.8 | 0 |
| 94  | hi  | 48.8 | 48.8 | 0 |
| 95  | hi  | 54.1 | 54.1 | 0 |
| 96  | low | 5.8  | 5.8  | 0 |
| 97  | hi  | 55.0 | 55.0 | 0 |
| 98  | hi  | 58.1 | 57.4 | 0 |
| 99  | hi  | 54.7 | 54.7 | 0 |
| 100 | low | 53.3 | 0.8  | 0 |
| 101 | hi  | 55.1 | 48.7 | 0 |
| 102 | low | 37.5 | 37.5 | 0 |
| 103 | low | 55.9 | 55.9 | 0 |
| 104 | hi  | 57.6 | 57.6 | 0 |
| 105 | low | 56.8 | 17.9 | 0 |
| 106 | low | 0.5  | 0.5  | 0 |
| 107 | hi  | 58.3 | 53.1 | 0 |
| 108 | hi  | 43.2 | 27.3 | 0 |
| 109 | low | 53.1 | 1.4  | 0 |
| 110 | low | 57.1 | 29.5 | 0 |
| 111 | low | 36.4 | 8.7  | 1 |
| 112 | low | 57.7 | 29.5 | 0 |
| 113 | low | 56.8 | 56.8 | 0 |
| 114 | low | 55.8 | 55.8 | 0 |
| 115 | hi  | 57.9 | 29.7 | 0 |
| 116 | low | 56.0 | 46.6 | 0 |
| 117 | low | 27.5 | 27.5 | 0 |
| 118 | low | 55.8 | 55.8 | 0 |
| 119 | hi  | 57.1 | 57.1 | 0 |
| 120 | low | 55.0 | 53.2 | 0 |

|     |     |      |      |   |
|-----|-----|------|------|---|
| 121 | low | 48.5 | 48.5 | 0 |
| 122 | low | 31.3 | 31.3 | 0 |
| 123 | low | 29.6 | 29.6 | 0 |
| 124 | hi  | 57.9 | 29.7 | 0 |
| 125 | hi  | 57.4 | 13.0 | 0 |
| 126 | low | 18.7 | 18.7 | 0 |
| 127 | low | 15.8 | 15.8 | 0 |
| 128 | hi  | 44.5 | 44.5 | 0 |
| 129 | low | 58.5 | 10.0 | 0 |
| 130 | hi  | 57.4 | 21.6 | 0 |
| 131 | hi  | 56.7 | 56.7 | 0 |
| 132 | low | 52.9 | 29.5 | 0 |
| 133 | low | 53.6 | 53.6 | 0 |
| 134 | hi  | 56.9 | 56.9 | 0 |
| 135 | low | 42.2 | 27.2 | 0 |
| 136 | low | 57.2 | 57.2 | 0 |
| 137 | hi  | 48.1 | 48.1 | 0 |
| 138 | low | 62.3 | 0.7  | 0 |
| 139 | low | 35.1 | 35.1 | 0 |
| 140 | low | 36.1 | 22.4 | 1 |
| 141 | hi  | 56.6 | 52.5 | 0 |
| 142 | low | 39.4 | 24.7 | 0 |
| 143 | low | 29.5 | 29.5 | 0 |
| 144 | low | 57.5 | 29.3 | 0 |
| 145 | hi  | 40.2 | 40.2 | 0 |
| 146 | hi  | 38.7 | 38.7 | 0 |
| 147 | hi  | 56.5 | 56.5 | 0 |
| 148 | low | 46.1 | 23.3 | 0 |
| 149 | hi  | 52.1 | 52.1 | 0 |
| 150 | low | 55.5 | 55.5 | 0 |
| 151 | hi  | 54.5 | 54.5 | 0 |
| 152 | hi  | 56.7 | 56.7 | 0 |
| 153 | low | 42.7 | 26.5 | 0 |
| 154 | hi  | 54.5 | 54.5 | 0 |
| 155 | hi  | 49.4 | 49.4 | 0 |
| 156 | low | 55.1 | 55.1 | 0 |
| 157 | low | 26.7 | 26.7 | 0 |
| 158 | low | 45.8 | 29.0 | 1 |
| 159 | hi  | 54.0 | 54.0 | 0 |
| 160 | hi  | 58.9 | 45.6 | 0 |
| 161 | low | 69.1 | 0.0  | 1 |

|     |     |      |      |   |
|-----|-----|------|------|---|
| 162 | low | 42.9 | 25.0 | 0 |
| 163 | low | 32.6 | 26.8 | 0 |
| 164 | low | 23.4 | 23.4 | 0 |
| 165 | low | 43.6 | 25.0 | 0 |
| 166 | hi  | 33.5 | 26.0 | 0 |
| 167 | low | 52.1 | 3.1  | 0 |
| 168 | low | 39.2 | 25.2 | 0 |
| 169 | low | 25.9 | 24.9 | 0 |
| 170 | hi  | 25.3 | 25.3 | 0 |
| 171 | low | 56.9 | 26.5 | 0 |
| 172 | low | 49.9 | 25.6 | 0 |
| 173 | hi  | 38.0 | 25.6 | 0 |
| 174 | low | 39.0 | 25.3 | 0 |
| 175 | low | 40.5 | 26.0 | 0 |
| 176 | low | 50.8 | 12.8 | 0 |
| 177 | low | 37.8 | 25.7 | 0 |
| 178 | low | 44.3 | 25.6 | 0 |
| 179 | hi  | 38.1 | 26.4 | 0 |
| 180 | low | 35.7 | 25.1 | 0 |
| 181 | low | 42.0 | 25.7 | 0 |
| 182 | low | 39.9 | 24.2 | 1 |
| 183 | low | 30.6 | 23.1 | 0 |
| 184 | low | 29.3 | 24.8 | 0 |
| 185 | low | 40.3 | 25.8 | 0 |
| 186 | low | 36.4 | 23.9 | 0 |
| 187 | hi  | 38.0 | 13.8 | 0 |
| 188 | low | 38.1 | 24.7 | 0 |
| 189 | low | 44.3 | 26.3 | 0 |
| 190 | low | 50.6 | 25.7 | 0 |
| 191 | hi  | 50.6 | 25.1 | 0 |
| 192 | low | 43.8 | 26.4 | 0 |
| 193 | hi  | 42.0 | 26.8 | 0 |
| 194 | hi  | 8.3  | 7.9  | 1 |
| 195 | hi  | 56.8 | 27.4 | 0 |
| 196 | low | 40.6 | 25.2 | 0 |
| 197 | hi  | 28.0 | 28.0 | 0 |
| 198 | low | 39.7 | 25.9 | 0 |
| 199 | hi  | 44.3 | 28.8 | 0 |
| 200 | low | 39.3 | 25.9 | 0 |
| 201 | hi  | 54.8 | 26.7 | 0 |
| 202 | low | 39.9 | 29.2 | 0 |

|     |     |      |      |   |
|-----|-----|------|------|---|
| 203 | low | 50.9 | 28.2 | 0 |
| 204 | hi  | 55.6 | 29.4 | 0 |
| 205 | hi  | 55.0 | 27.0 | 0 |
| 206 | hi  | 56.0 | 56.0 | 0 |
| 207 | low | 55.1 | 55.1 | 0 |
| 208 | low | 40.9 | 13.1 | 1 |
| 209 | hi  | 59.3 | 59.3 | 0 |
| 210 | low | 44.8 | 26.1 | 0 |
| 211 | hi  | 59.3 | 59.3 | 0 |
| 212 | hi  | 45.7 | 31.5 | 0 |
| 213 | low | 61.7 | 59.7 | 0 |
| 214 | hi  | 60.4 | 59.5 | 0 |
| 215 | hi  | 60.0 | 60.0 | 0 |
| 216 | hi  | 59.5 | 31.4 | 0 |
| 217 | low | 42.4 | 32.1 | 0 |
| 218 | hi  | 57.1 | 57.1 | 0 |
| 219 | hi  | 84.7 | 49.3 | 1 |
| 220 | hi  | 55.3 | 55.3 | 0 |
| 221 | low | 29.4 | 27.0 | 1 |
| 222 | hi  | 55.1 | 55.1 | 0 |
| 223 | low | 24.7 | 13.2 | 1 |
| 224 | hi  | 35.7 | 29.7 | 0 |
| 225 | low | 57.3 | 29.7 | 0 |
| 226 | hi  | 60.4 | 59.5 | 0 |
| 227 | hi  | 61.2 | 58.1 | 0 |
| 228 | hi  | 60.4 | 59.5 | 0 |
| 229 | low | 45.9 | 23.0 | 1 |
| 230 | hi  | 40.7 | 33.0 | 0 |
| 231 | hi  | 59.9 | 26.1 | 0 |
| 232 | hi  | 57.1 | 55.5 | 0 |
| 233 | low | 31.8 | 31.8 | 0 |
| 234 | low | 3.2  | 3.2  | 0 |
| 235 | hi  | 62.4 | 62.4 | 0 |
| 236 | hi  | 43.2 | 22.5 | 0 |
| 237 | hi  | 61.4 | 61.4 | 0 |
| 238 | hi  | 61.2 | 61.2 | 0 |
| 239 | hi  | 46.7 | 33.4 | 0 |
| 240 | hi  | 32.6 | 32.6 | 1 |
| 241 | low | 60.9 | 60.9 | 0 |
| 242 | low | 45.4 | 13.9 | 0 |
| 243 | hi  | 61.2 | 61.2 | 0 |

|     |     |      |      |   |
|-----|-----|------|------|---|
| 244 | hi  | 60.2 | 60.2 | 0 |
| 245 | low | 38.1 | 25.5 | 0 |
| 246 | hi  | 60.9 | 60.9 | 0 |
| 247 | low | 41.1 | 11.5 | 1 |
| 248 | low | 61.4 | 61.4 | 0 |
| 249 | hi  | 61.8 | 61.8 | 0 |
| 250 | hi  | 60.5 | 60.0 | 0 |
| 251 | hi  | 65.1 | 61.4 | 0 |
| 252 | low | 60.5 | 59.4 | 0 |
| 253 | hi  | 59.4 | 59.4 | 0 |
| 254 | hi  | 62.8 | 33.5 | 0 |
| 255 | hi  | 59.8 | 59.8 | 0 |
| 256 | low | 24.8 | 24.8 | 0 |
| 257 | hi  | 61.4 | 61.4 | 0 |
| 258 | low | 45.6 | 19.4 | 0 |
