# Supplementary material for: Chromatin Remodelling Molecule ARID1A Determines Metastatic Heterogeneity in Triple-Negative Breast Cancer by Competitively Binding to YAP
Source: MDPI journal article supplement (doi:10.3390/cancers15092447), 2023-04-25

### Supplement3 A

293T

WT  
MUT-1  
MUT-2  
MUT-3  
MUT-4  
MUT-5

Inputs

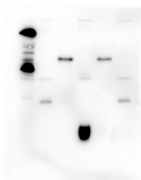

Flag(YAP)  
short exposure

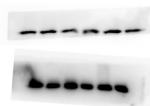

ARID1A

GAPDH

### Supplement3 B

293T

WT  
MUT-1  
MUT-2  
MUT-3  
MUT-4  
MUT-5

Flag(YAP)  
Long exposure

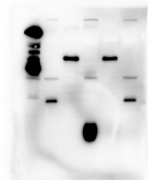

IP(YAP)

293T

WT  
MUT-1  
MUT-2  
MUT-3  
MUT-4  
MUT-5  
WT  
MUT-1  
MUT-2  
MUT-3  
MUT-4  
MUT-5

Flag(YAP)  
Short exposure

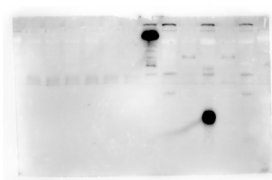

### Supplement3 C

293T

WT  
MUT-1  
MUT-2  
MUT-3  
MUT-4  
MUT-5

Inputs

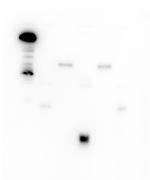

Flag(YAP)  
short exposure

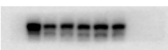

ARID1A

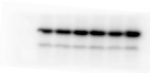

GAPDH

### Supplement3 D

293T

WT  
MUT-1  
MUT-2  
MUT-3  
MUT-4  
MUT-5

Flag(YAP)  
Long exposure

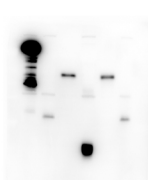

IP(ARID1A)

293T

WT  
MUT-1  
MUT-2  
MUT-3  
MUT-4  
MUT-5  
WT  
MUT-1  
MUT-2  
MUT-3  
MUT-4  
MUT-5

Flag(YAP)  
Long exposure

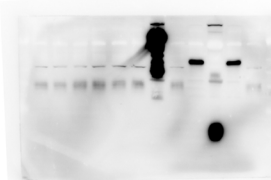

Supplement: s1 [file s1]
