# Supplementary figures and images for: Chromatin Remodelling Molecule ARID1A Determines Metastatic Heterogeneity in Triple-Negative Breast Cancer by Competitively Binding to YAP
Source: MDPI journal article supplement (doi:10.3390/cancers15092447), 2023-04-25

Fig 5D

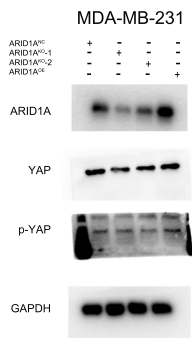

Fig 5E

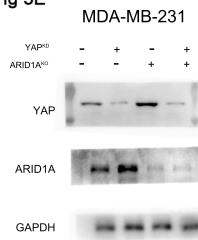

Fig 5H

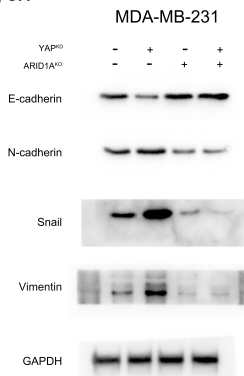

Supplement: s1 [file s1]

## Supplement1 A

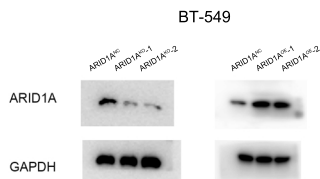

## Supplement1 G

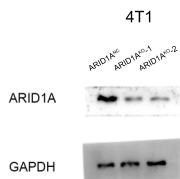

## Supplement1 H

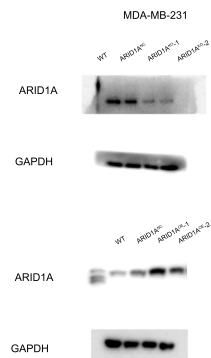

## Supplement1 I

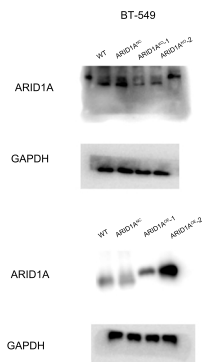

Supplement: s1 [file s1]

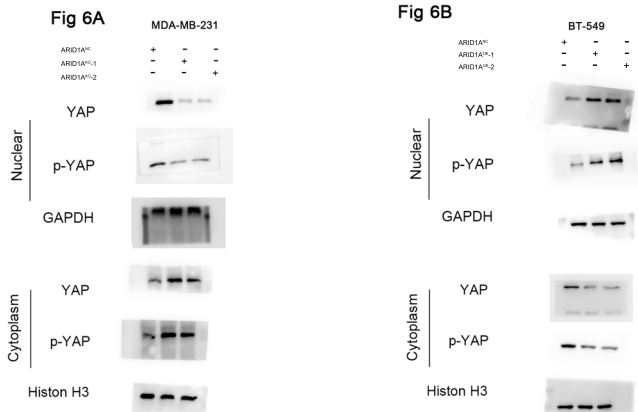

**Fig 6D**

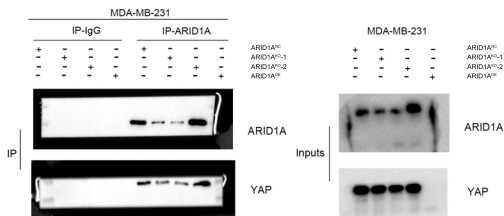

**Fig 6E**

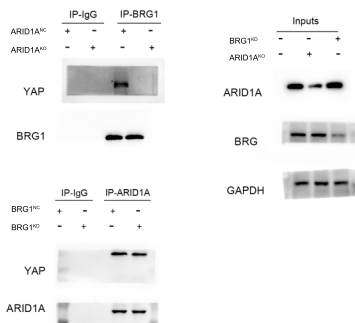

Supplement: s1 [file s1]

Fig 6F

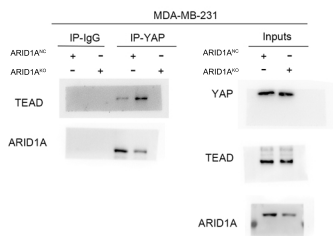

Fig7 B

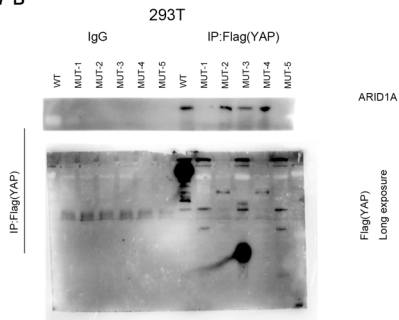

Fig7 C

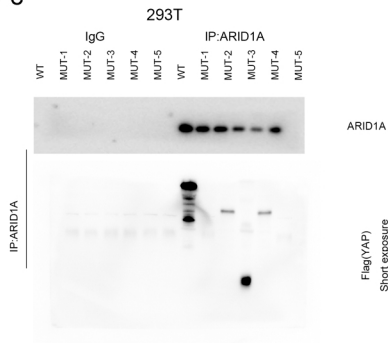

Fig F

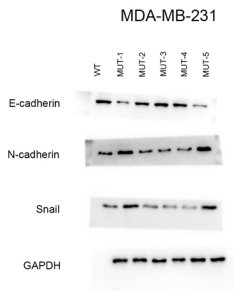

Supplement: s1 [file s1]

Supplement2 A

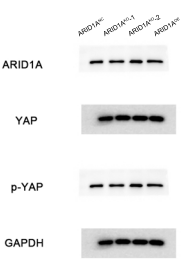

Supplement2 B

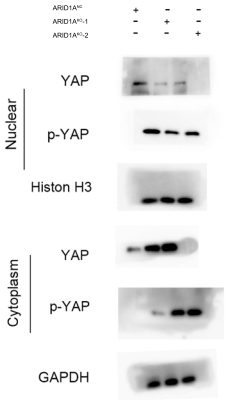

Supplement2 C

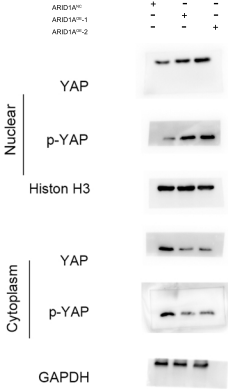

Supplement2 D

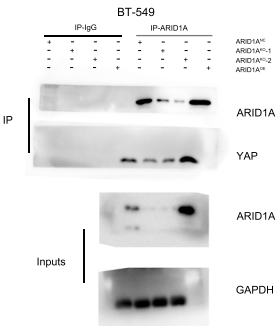

Supplement2 E

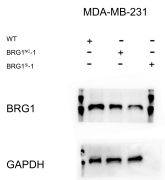

Supplement: s1 [file s1]

Fig 1F

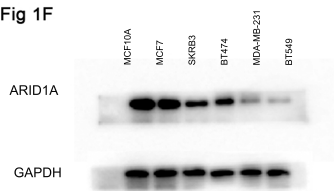

Fig 2A

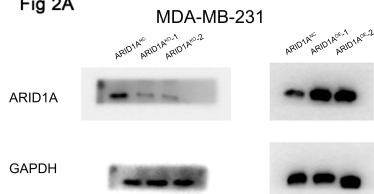

Fig 4A

MDA-MB-231

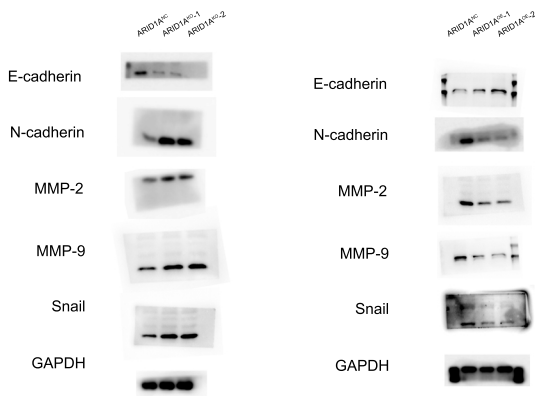

Fig 4B

BT-549

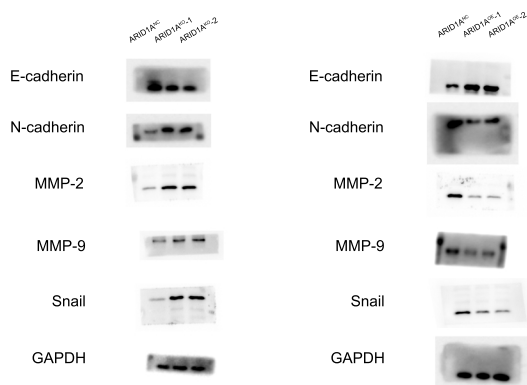

Supplement: s1 [file s1]
